# Supplementary material for: Gender Parity in Geriatrics Editorial Boards
Source: MDPI journal article supplement (doi:10.3390/geriatrics7050090), 2022-09-03
Supplement: s1 [file s1]

Supplemental Table S1

| <b>Journal</b>                                                              | <b>Journal Impact Factor</b> | <b>Country where Journal is Based</b> | <b>Editor-in-Chief Gender (Male)</b> | <b>Editor-in-Chief Gender (Female)</b> | <b>Gender of the Editorial Members M(n)</b> | <b>Gender of the Editorial Members F(n)</b> |
|-----------------------------------------------------------------------------|------------------------------|---------------------------------------|--------------------------------------|----------------------------------------|---------------------------------------------|---------------------------------------------|
| Journal of Cachexia Sarcopenia and Muscle                                   | 12.91                        | Germany                               | 1                                    | 0                                      | 45                                          | 11                                          |
| Aging Research Reviews                                                      | 10.895                       | Ireland                               | 1                                    | 0                                      | 33                                          | 17                                          |
| Age and Aging                                                               | 10.668                       | UK                                    | 1                                    | 0                                      | 27                                          | 11                                          |
| Aging Cell                                                                  | 9.304                        | UK                                    | 2                                    | 2                                      | 81                                          | 28                                          |
| GeroScience                                                                 | 7.713                        | USA                                   | 1                                    | 1                                      | 31                                          | 13                                          |
| Journal of Gerontology Series A-Biological Sciences and Medical Sciences    | 6.053                        | USA                                   | 1                                    | 0                                      | 68                                          | 40                                          |
| Frontiers in Aging Neuroscience                                             | 5.75                         | Switzerland                           | 1                                    | 0                                      | 5                                           | 2                                           |
| Aging-US                                                                    | 5.682                        | USA                                   | 3                                    | 2                                      | 65                                          | 12                                          |
| Journal of The American Geriatric Society                                   | 5.562                        | USA                                   | 1                                    | 0                                      | 47                                          | 31                                          |
| Mechanisms of Aging and Development                                         | 5.432                        | Netherlands                           | 1                                    | 0                                      | 38                                          | 18                                          |
| Aging and Disease                                                           | 5.4                          | USA                                   | 3                                    | 0                                      | 31                                          | 9                                           |
| Immunity & Ageing                                                           | 5.366                        | UK                                    | 2                                    | 0                                      | 22                                          | 10                                          |
| Biogerontology                                                              | 5.252                        | Switzerland                           | 1                                    | 0                                      | 40                                          | 5                                           |
| Journals of Gerontology Series B—Psychological Sciences and Social Sciences | 5.06                         | USA                                   | 1                                    | 1                                      | 65                                          | 98                                          |
| BMC Geriatrics                                                              | 4.878                        | UK                                    | 1                                    | 0                                      | 103                                         | 82                                          |
| American Journal of Geriatric Psychiatry                                    | 4.748                        | USA                                   | 1                                    | 0                                      | 21                                          | 13                                          |
| Clinical Interventions in Aging                                             | 4.744                        | UK                                    | 1                                    | 0                                      | 15                                          | 11                                          |
| Neurobiology of Aging                                                       | 4.673                        | Netherlands                           | 1                                    | 0                                      | 45                                          | 7                                           |
| Journal of the American Medical Directors Association                       | 4.669                        | USA                                   | 1                                    | 1                                      | 40                                          | 29                                          |
| Rejuvenation Research                                                       | 4.663                        | USA                                   | 0                                    | 1                                      | 39                                          | 11                                          |
| Aging and Mental Health                                                     | 4.411                        | UK                                    | 2                                    | 1                                      | 30                                          | 25                                          |
| Experimental Gerontology                                                    | 4.032                        | Netherlands                           | 1                                    | 0                                      | 45                                          | 18                                          |
| Drugs and Aging                                                             | 3.923                        | UK                                    | 1                                    | 0                                      | 28                                          | 9                                           |
| International Psychogeriatrics                                              | 3.878                        | UK                                    | 1                                    | 0                                      | 22                                          | 14                                          |
| Aging clinical and experimental research                                    | 3.638                        | Germany                               | 0                                    | 1                                      | 93                                          | 38                                          |
| Journal of Geriatric Oncology                                               | 3.599                        | USA                                   | 0                                    | 1                                      | 35                                          | 45                                          |
| International Journal of Geriatric Psychiatry                               | 3.485                        | UK                                    | 1                                    | 0                                      | 44                                          | 7                                           |
| Journal of geriatric physical therapy                                       | 3.381                        | USA                                   | 0                                    | 1                                      | 4                                           | 5                                           |

|                                                             |       |             |   |   |    |    |
|-------------------------------------------------------------|-------|-------------|---|---|----|----|
| Archives of gerontology and geriatrics                      | 3.25  | Ireland     | 1 | 0 | 29 | 1  |
| Journal of nutrition health & aging                         | 2.99  | France      | 2 | 1 | 8  | 10 |
| Gerodontology                                               | 2.98  | USA         | 1 | 0 | 16 | 8  |
| Dementia and Geriatric Cognitive Disorders                  | 2.959 | Switzerland | 0 | 1 | 48 | 15 |
| Geriatrics & gerontology international                      | 2.73  | Japan       | 1 | 0 | 47 | 5  |
| Journal of geriatric psychiatry and neurology               | 2.68  | USA         | 1 | 0 | 15 | 7  |
| Clinical Gerontologist                                      | 2.646 | USA         | 0 | 1 | 17 | 21 |
| European review of aging and physical activity              | 2.517 | Germany     | 1 | 1 | 14 | 7  |
| Geriatric Nursing                                           | 2.361 | USA         | 0 | 1 | 4  | 19 |
| American journal of Alzheimer's disease and other dementias | 2.305 | USA         | 1 | 0 | 45 | 23 |
| International journal of older people nursing               | 2.115 | USA         | 0 | 1 | 3  | 24 |
| Australasian journal on ageing                              | 2.11  | Australia   | 0 | 1 | 5  | 7  |
| Journal of Aging and Physical Activity                      | 1.961 | USA         | 1 | 0 | 13 | 31 |
| Geriatric orthopedic surgery & rehabilitation               | 1.87  | USA         | 1 | 0 | 15 | 4  |
| European geriatric medicine                                 | 1.71  | France      | 1 | 0 | 27 | 9  |
| Experimental Aging Research                                 | 1.645 | UK          | 1 | 0 | 40 | 15 |
| Journal of Gerontological Nursing                           | 1.254 | USA         | 0 | 1 | 5  | 44 |
| International Journal of Gerontology                        | 0.877 | Taiwan      | 1 | 0 | 19 | 7  |
| Turkish Journal of Geriatrics                               | 0.382 | Turkey      | 0 | 1 | 6  | 0  |

Supplemental Table S2

| Row Labels    | Sum of Editor-in-Chief Gender (Male) | Sum of Editor-in-Chief Gender (Female) | Sum of Total Editors in Chiefs | Percentage of Female Editor in Chiefs |
|---------------|--------------------------------------|----------------------------------------|--------------------------------|---------------------------------------|
| North America | 17                                   | 12                                     | 29                             | 41.3%                                 |
| Europe        | 25                                   | 8                                      | 33                             | 24.2%                                 |

Supplemental Table S3

| Country     | Sum of Editor-in-Chief gender (Male) | Sum of Editor-in-Chief gender (Female) |
|-------------|--------------------------------------|----------------------------------------|
| Australia   | 0                                    | 1                                      |
| France      | 3                                    | 1                                      |
| Germany     | 2                                    | 2                                      |
| Ireland     | 2                                    | 0                                      |
| Japan       | 1                                    | 0                                      |
| Netherlands | 3                                    | 0                                      |
| Switzerland | 2                                    | 1                                      |

|                    |           |           |
|--------------------|-----------|-----------|
| Taiwan             | 1         | 0         |
| Turkey             | 0         | 1         |
| UK                 | 13        | 3         |
| USA                | 17        | 12        |
| <b>Grand Total</b> | <b>44</b> | <b>21</b> |

Supplemental Table S4

| <b>Country</b>     | <b>Sum of Gender of the Editorial Members M(n)</b> | <b>Sum of Gender of the Editorial Members F(n)</b> |
|--------------------|----------------------------------------------------|----------------------------------------------------|
| Australia          | 5                                                  | 7                                                  |
| France             | 35                                                 | 19                                                 |
| Germany            | 152                                                | 56                                                 |
| Ireland            | 62                                                 | 18                                                 |
| Japan              | 47                                                 | 5                                                  |
| Netherlands        | 128                                                | 43                                                 |
| Switzerland        | 93                                                 | 22                                                 |
| Taiwan             | 19                                                 | 7                                                  |
| Turkey             | 6                                                  | 0                                                  |
| UK                 | 412                                                | 212                                                |
| USA                | 579                                                | 487                                                |
| <b>Grand Total</b> | <b>1538</b>                                        | <b>876</b>                                         |

Supplemental Table S5

| <b>Journal Impact Factor</b> | <b>Sum of Editor-in-Chief Gender (Male)</b> | <b>Sum of Editor-in-Chief Gender (Female)</b> |
|------------------------------|---------------------------------------------|-----------------------------------------------|
| 12.91                        | 1                                           | 0                                             |
| 10.895                       | 1                                           | 0                                             |
| 10.668                       | 1                                           | 0                                             |

Supplemental Table S6

| <b>Number of Male Editor in Chiefs</b> | <b>Percentage of Female Editorial Members</b> |
|----------------------------------------|-----------------------------------------------|
| 0                                      | 47%                                           |
| 1                                      | 35%                                           |
| 2                                      | 34%                                           |
| 3                                      | 18%                                           |

Supplemental Table S7

| <b>Number of Male Editor in Chiefs</b> | <b>Percentage of Male Editorial Members</b> |
|----------------------------------------|---------------------------------------------|
| 0                                      | 53%                                         |
| 1                                      | 65%                                         |
| 2                                      | 66%                                         |
| 3                                      | 82%                                         |
